# Supplementary material for: Managing hepatocellular carcinoma across the stages: efficacy and outcomes of stereotactic body radiotherapy: A retrospective study
Source: PubMed Central journal article supplement (PMC11272809; doi:10.1007/s00066-024-02235-5), 2024-04-30

# Supplementary Figures

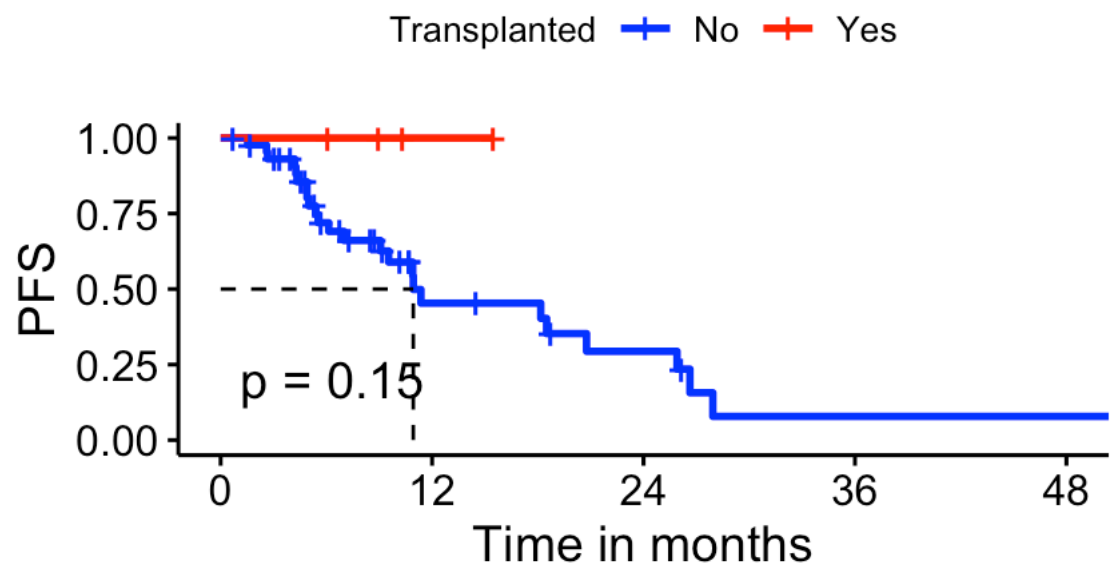

Number at risk

|              |    |    |    |    |    |    |
|--------------|----|----|----|----|----|----|
| Transplanted |    | 0  | 12 | 24 | 36 | 48 |
| No           | 45 | 10 | 5  | 1  | 1  |    |
| Yes          | 4  | 1  | 0  | 0  | 0  |    |

Time in months

a

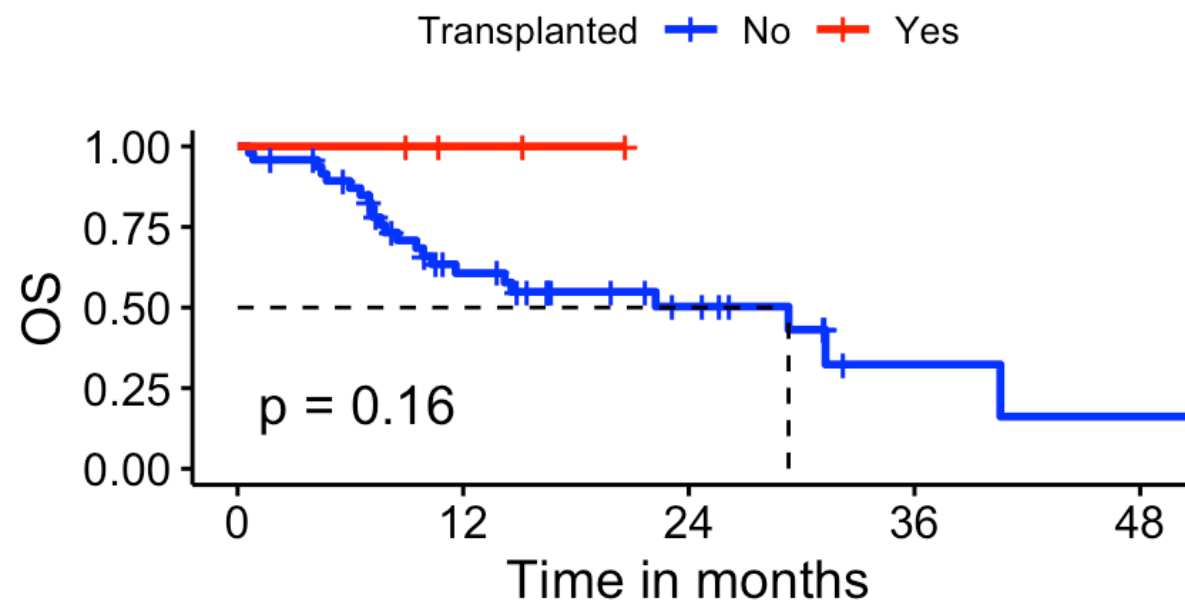

Number at risk

|              |    |    |    |    |    |    |
|--------------|----|----|----|----|----|----|
| Transplanted |    | 0  | 12 | 24 | 36 | 48 |
| No           | 48 | 22 | 10 | 2  | 1  |    |
| Yes          | 4  | 2  | 0  | 0  | 0  |    |

Time in months

b

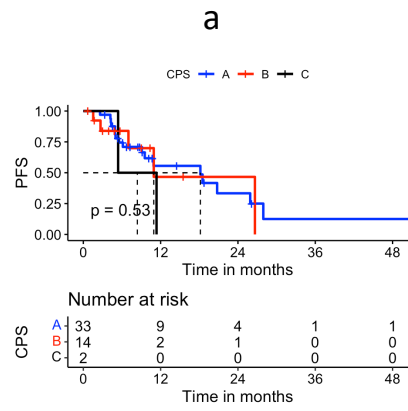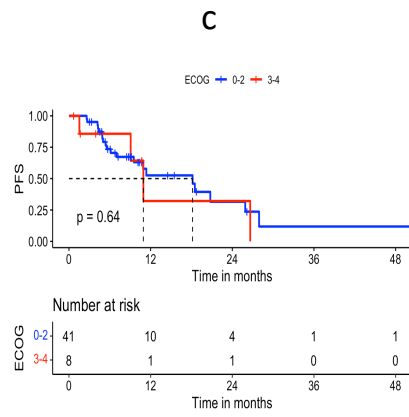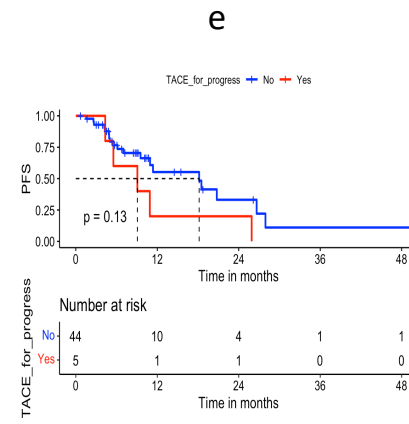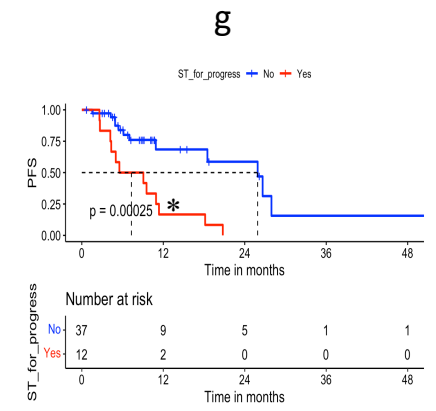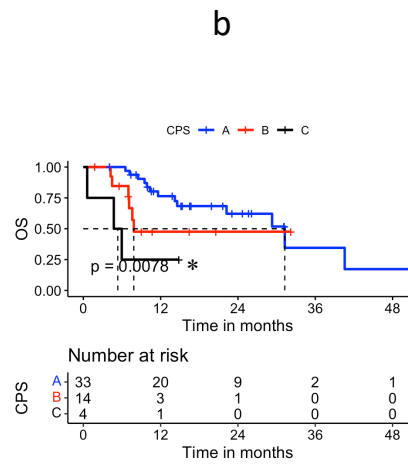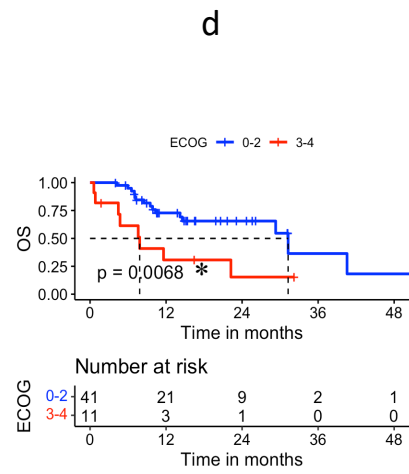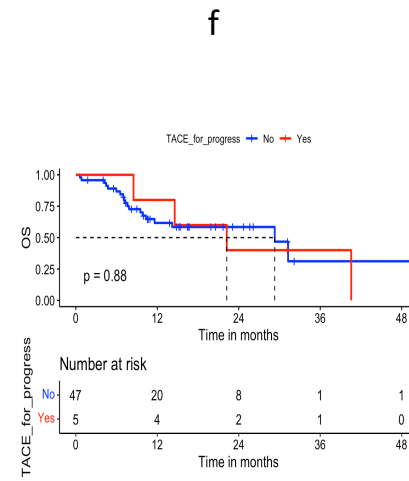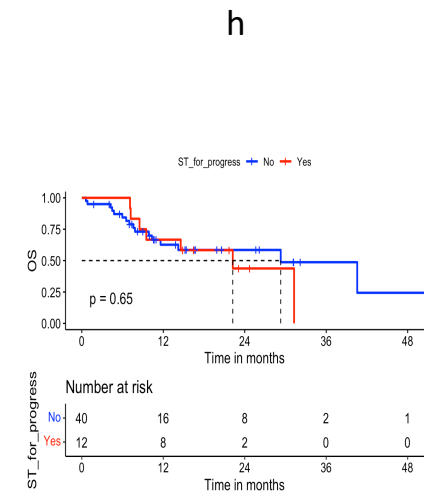

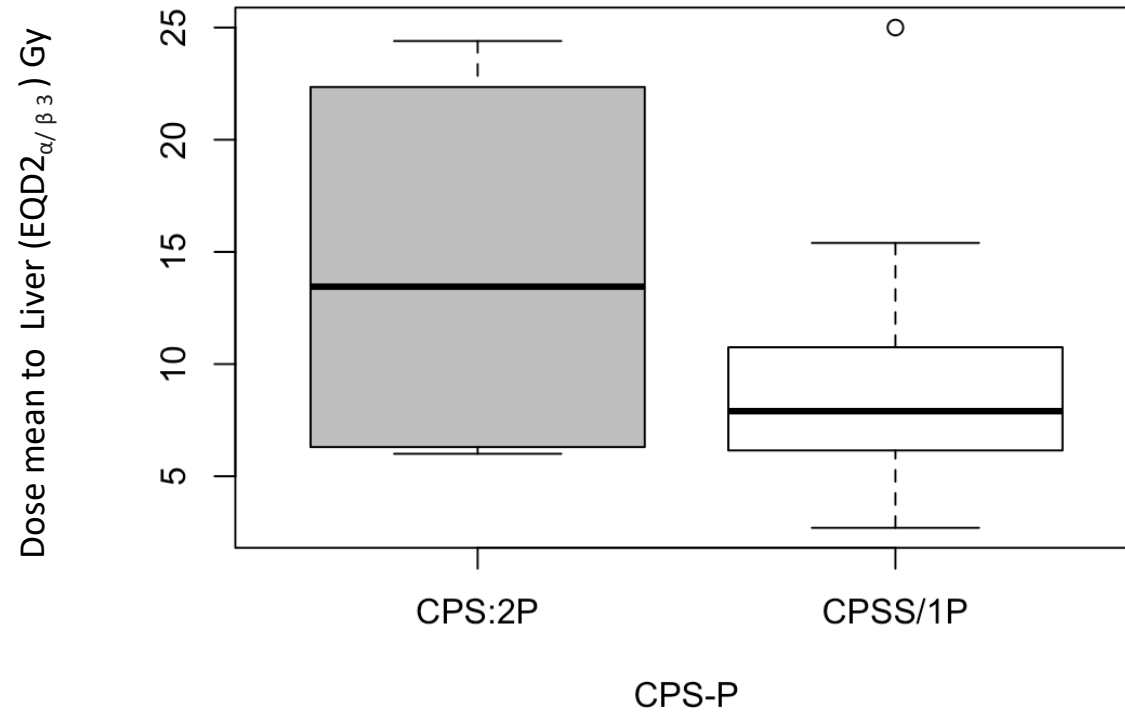

Supplement: 66_2024_2235_MOESM2_ESM.pdf [file 66_2024_2235_MOESM2_ESM.pdf]
